# Supplementary material
Source: PubMed Central journal article supplement (PMC2799828)
Supplement: 0908097106_0908097106SI.pdf [file 0908097106_0908097106SI.pdf]

# Supporting Information

Mesa et al. 10.1073/pnas.0908097106

## SI Text

**Growth Conditions.** *Escherichia coli* DH5 $\alpha$  cells were grown in Luria–Bertani medium at 37 °C (1). *E. coli* BL21 (DE3) cells were incubated at 30 °C. Antibiotics were used as follows (in  $\mu\text{g}/\text{mL}$ ): ampicillin, 200; kanamycin, 30. *Bradyrhizobium japonicum* was grown oxically and micro-oxically (0.5% O<sub>2</sub> in the gas phase) in a modified PSY medium (2, 3). Yeast extract-mannitol medium (4) supplemented with 10 mM KNO<sub>3</sub> was used for *B. japonicum* growth under anoxic conditions (N<sub>2</sub> in the gas phase). Concentrations of antibiotics in cultures were as follows (in  $\mu\text{g}/\text{mL}$ ): chloramphenicol, 20; spectinomycin, 100; kanamycin, 100.

**Plasmid Construction.** Plasmids coding for N-terminally His<sub>6</sub>-tagged FixK<sub>2</sub> derivatives were constructed by QuikChange site-directed mutagenesis using pRJ9058 as template (5). For simplification, the prefix “His<sub>6</sub>” was omitted from all protein designations. Two complementary oligonucleotides were chosen to replace the cysteine 183 codon of *fixK*<sub>2</sub> by an alanine codon, yielding plasmid pRJ8847 (primer sequences are available from the authors on request). The correct nucleotide exchanges were confirmed by DNA sequencing. Plasmid pRJ8849 was then created by insertion of a 1.32-kb NdeI–NotI fragment from the pRJ8847 plasmid into pET-28a(+) (Novagen). The point mutation was also prepared for introduction into *B. japonicum*. First, a 1.17-kb BglII/NotI fragment from pRJ8847 was cloned into pRJ9041, yielding plasmid pRJ8851, and a 1.85-kb BamHI fragment thereof was then cloned into the Km<sup>R</sup>-suicide vector pK18*mobsacB* (6) to yield plasmid pRJ8854.

**Construction of *B. japonicum* Strain with *fixK*<sub>2</sub> Point Mutation.** Plasmid pRJ8854 was transferred by conjugation from *E. coli* S17–1 (7) to *B. japonicum* 110*spc4* for markerless mutant construction. Km<sup>R</sup> exconjugants were selected and grown in the presence of 10% sucrose to force loss of the vector-encoded *sacB* gene. The resulting colonies were checked for Km sensitivity. The desired point mutation was confirmed by PCR and sequence analysis. The strain thus obtained was named 8854.

**Protein Expression and Purification.** Expression and purification of FixK<sub>2</sub> and C183A-FixK<sub>2</sub> were carried out as described in ref. 5. Protein concentrations were determined by using the Bio-Rad assay with BSA as standard. If not indicated, protein concentrations reported in this study refer to the dimeric state of FixK<sub>2</sub>.

**Biochemical Characterization.** The reactivity of the different FixK<sub>2</sub> derivatives to oxidation was visualized by the different motility of its reduced (i.e., monomeric) and oxidized (i.e., dimeric) forms in SDS/PAGE (8). For reduction, FixK<sub>2</sub> derivatives (7  $\mu\text{M}$ ) were incubated with different concentrations of DTT (1–100 mM) for 2 h at 25 °C. This treatment did not inhibit FixK<sub>2</sub> activity. Reactions were stopped by adding an equal volume of SDS loading dye (4% SDS, 20% glycerol, 125 mM Tris·HCl, pH 6.8, 0.02% bromophenol blue). For oxidation, proteins were incubated with APS (0.05–5 mM) or CuCl<sub>2</sub> (0.1–10 mM) for 2 h, or with H<sub>2</sub>O<sub>2</sub> (0.01–1 mM) for 4 h at 25 °C. Nontreated samples were used as control. Gels were stained with Coomassie brilliant

blue (9). Protein bands were quantified by gel scanning and densitometry with Alpha Imager 3400 (Alpha Innotech), and the dimerization efficiency was calculated as the ratio between the dimeric species and the total protein loaded in each lane.

**In-Gel Digestion and MS Analyses.** Stained protein bands were excised from the gel, cut into small pieces, washed twice with 100  $\mu\text{L}$  of a solution containing 100 mM NH<sub>4</sub>HCO<sub>3</sub> and 50% acetonitrile, and later dehydrated with 50  $\mu\text{L}$  acetonitrile. Digestions were performed overnight at 37 °C with 0.13 ng of AspN; (*EC* 3.4.24.33; Roche Diagnostics) in 73  $\mu\text{L}$  of digestion buffer (10 mM Tris·HCl, pH 8.2). After digestion, the supernatant was removed, and the gel pieces were extracted twice with 100  $\mu\text{L}$  of a solution containing 0.1% TFA and 50% acetonitrile. The three supernatants were combined, dried, and finally dissolved in 15  $\mu\text{L}$  of 0.1% TFA. Before analyses, samples were desalted using a ZipTipC18 (Millipore) and mixed 1:1 with matrix solution (5 mg/mL of  $\alpha$ -cyano-4-hydroxycinnamic acid in a solution containing 50% acetonitrile and 0.1% TFA). Mass spectra were recorded in positive ion mode on an Ultraflex II mass spectrometer (with SmartBeam upgrade; Bruker).

**Immunoblot Analysis.** Purified FixK<sub>2</sub> was used to raise a polyclonal antibody from rabbits (NeoMPS). The obtained FixK<sub>2</sub> antiserum was purified by preabsorption as described in ref. 10 against total protein extracted from a  $\Delta$ *fixK*<sub>2</sub> mutant. To examine the steady-state levels of FixK<sub>2</sub>, *B. japonicum* cells were grown oxically, micro-oxically, and anoxically until midexponential phase. After centrifugation for 2 min (18,500  $\times$  g, 4 °C), cell pellets were resuspended in lysis buffer (40 mM Tris·HCl pH 7.0, 150 mM KCl, 0.2 mM PMSF) and disrupted by three passages through a French pressure cell press. Cell suspensions were centrifuged (30 min, 4 °C, 27,000  $\times$  g) to obtain total cell extract from the supernatant. Cell extracts were then mixed with loading dye, boiled, and electrophoresed through 14% SDS/PAGE gels along with samples of known amounts of purified FixK<sub>2</sub>. Immunoblotting was carried out with anti-FixK<sub>2</sub> (1:500 dilution) and HRP-conjugated goat anti-rabbit IgG (1:3,500 dilution; Bio-Rad) with detection using the SuperSignal West Pico chemiluminescent kit (Pierce).

**In Vitro Transcription Experiments.** Multiple-round in vitro transcription assays were carried out at 37 °C as described in ref. 5. Purified FixK<sub>2</sub> derivatives (WT and mutant) were treated before they were tested in the in vitro transcription assays. Control reactions were performed with nontreated protein samples. To monitor FixK<sub>2</sub>-dependent in vitro transcription, the template was plasmid pRJ8816, which harbors the *fixNOQP* promoter upstream of a *B. japonicum* *rrn* transcription terminator (5). Suitable RNA size markers were prepared in vitro with T3 RNA polymerase as described in ref. 5. Transcripts were visualized with a PhosphorImager and signal intensities were determined with the Bio-Rad Quantity One software (version 4.6.5; Bio-Rad).

**Biocomputing Analysis of FixK<sub>2</sub>.** To model the structure of FixK<sub>2</sub>, the 3D-PSSM Server (<http://www.sbg.bio.ic.ac.uk/~3dpssm/>) was used. FixK<sub>2</sub> and *E. coli* CRP were used to generate a project file that was visualized and edited with the Swiss-PDB Viewer.

1. Miller JH (1972) *Experiments in Molecular Genetics* (Cold Spring Harbor Lab Press, Cold Spring Harbor, NY).  
2. Pessi G, et al. (2007) Genome-wide transcript analysis of *Bradyrhizobium japonicum* bacteroids in soybean root nodules. *Mol Plant-Microbe Interact* 20:1353–1363.

3. Mesa S, et al. (2008) Comprehensive assessment of the regulons controlled by the FixLJ-FixK<sub>2</sub>-FixK<sub>1</sub> cascade in *Bradyrhizobium japonicum*. *J Bacteriol* 190:6568–6579.

4. Daniel RM, Appleby CA (1972) Anaerobic-nitrate, symbiotic and aerobic growth of *Rhizobium japonicum*: Effects on cytochrome P450, other haemoproteins, nitrate and nitrite reductases. *Biochim Biophys Acta* 275:347–354.
5. Mesa S, Ucurum Z, Hennecke H, Fischer HM (2005) Transcription activation *in vitro* by the *Bradyrhizobium japonicum* regulatory protein FixK<sub>2</sub>. *J Bacteriol* 187:3329–3338.
6. Schäfer A, et al. (1994) Small mobilizable multi-purpose cloning vectors derived from the *Escherichia coli* plasmids pK18 and pK19: Selection of defined deletions in the chromosome of *Corynebacterium glutamicum*. *Gene* 145:69–73.
7. Simon R, Priefer U, Pühler A (1983) A broad host range mobilization system for *in vivo* genetic engineering: Transposon mutagenesis in Gram-negative bacteria. *Bio-Technology* 1:784–791.
8. Laemmli UK (1970) Cleavage of structural proteins during the assembly of the head of bacteriophage T4. *Nature* 227:680–685.
9. Sambrook J, Russell DW (2001) *Molecular Cloning: A Laboratory Manual* (Cold Spring Harbor Lab Press, Cold Spring Harbor, NY) 3rd Ed.
10. Harlow E, Lane D (1999) *Antibodies: A Laboratory Manual* (Cold Spring Harbor Lab Press, Cold Spring Harbor, NY).
11. Notredame C, Higgins DG, Heringa J (2000) T-Coffee: A novel method for fast and accurate multiple sequence alignment. *J Mol Biol* 302:205–217.
12. Kerby RL, Youn H, Thorsteinsson MV, Roberts GP (2003) Repositioning about the dimer interface of the transcription regulator CooA: A major signal transduction pathway between the effector and DNA-binding domains. *J Mol Biol* 325:809–823.
13. Moore LJ, Kiley PJ (2001) Characterization of the dimerization domain in the FNR transcription factor. *J Biol Chem* 276:45744–45750.
14. Green J, Scott C, Guest JR (2001) Functional versatility in the CRP-FNR superfamily of transcription factors: FNR and FLP. *Adv Microb Physiol* 44:1–34.

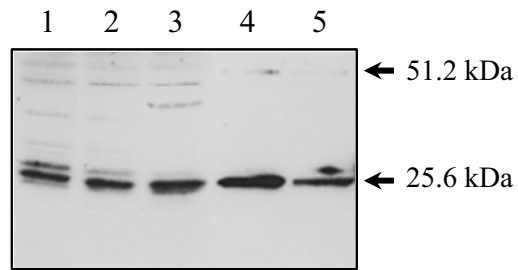

**Fig. S1.** Immunodetection of FixK<sub>2</sub> in vivo. Steady-state levels of FixK<sub>2</sub> were detected with a polyclonal antibody in cells grown at different growth conditions. Lanes 1, 2, and 3 were loaded with 60  $\mu$ g of total cell extract from *B. japonicum* WT grown oxically, micro-oxically and anoxically, respectively. For quantification, 3 ng and 0.6 ng of purified nontagged FixK<sub>2</sub> protein (a kind gift of M. Bonnet, authors' laboratory) were run in the same gel (lanes 4 and 5, respectively). The positions of the predicted molecular masses of the monomeric and dimeric forms of FixK<sub>2</sub> are marked with arrows (*Right*). For details, see the [SI Text](#).

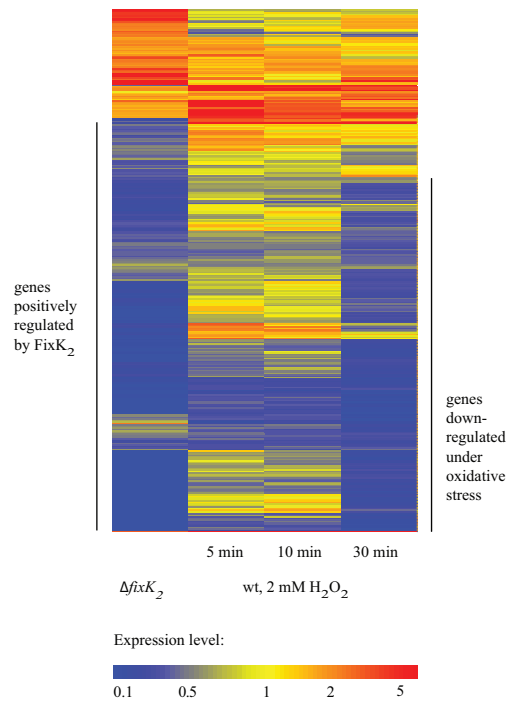

**Fig. S2.** Hierarchical clustering of FixK<sub>2</sub> target gene expression changes in *B. japonicum* after treatment with H<sub>2</sub>O<sub>2</sub>. Gene expression profiles of a  $\Delta fixK_2$  mutant (Left) and of WT cells treated with 2 mM H<sub>2</sub>O<sub>2</sub> for the time periods indicated were determined with untreated WT cells as a reference. The color code for expression levels (log scale) is shown (Bottom). Genes with strongly decreased expression in the  $\Delta fixK_2$  strain (blue) are those that are activated by FixK<sub>2</sub> in the WT. Almost all these genes are strongly down-regulated at the latest after 30 min incubation with H<sub>2</sub>O<sub>2</sub> (right-most lane).

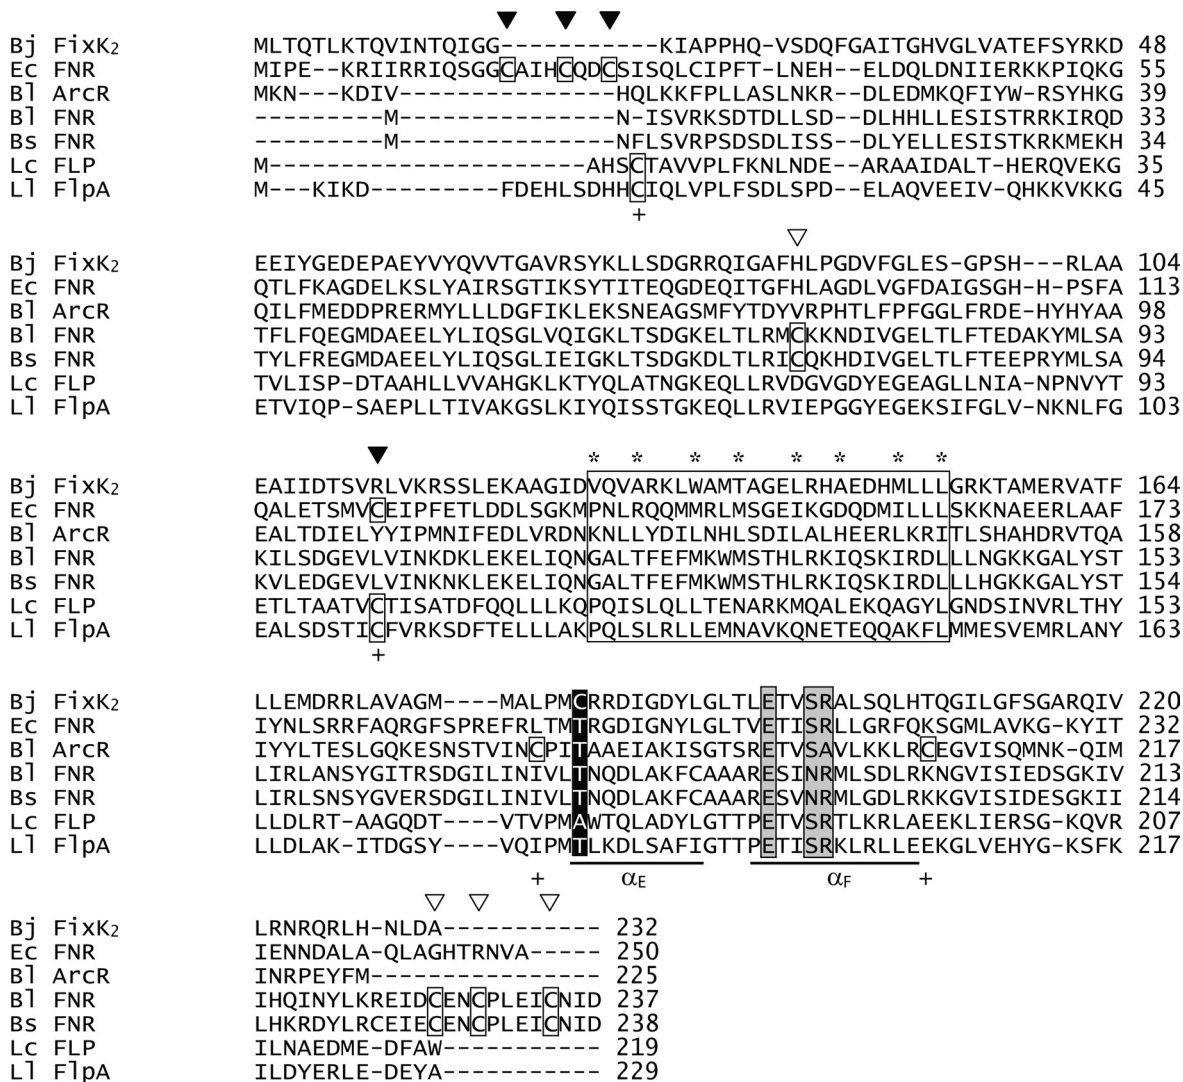

**Fig. S3.** Alignment of the amino acid sequences of *B. japonicum* FixK<sub>2</sub> and of other CRP/FNR family members. The following sequences and database numbers are shown: *B. japonicum* FixK<sub>2</sub> (Bj FixK<sub>2</sub>, CAA06287); *E. coli* FNR (Ec FNR, P0A9E5); *Bacillus licheniformis* ArcR (B1 ArcR, CAB95946); *B. licheniformis* FNR (B1 FNR, CAA76344); *Bacillus subtilis* FNR (Bs FNR, CAA90042); *Lactobacillus casei* FLP (Lc FLP, P29284); and *Lactococcus lactis* F1pA (L1 F1pA, CAB53580). Amino acid sequences were aligned with the program T-COFFEE (<http://tcoffee.vital-it.ch/cgi-bin/Tcoffee/tcoffee.cgi/index.cgi>) (11). The hydrophobic,  $\alpha$ -helical domain involved in dimer formation is boxed and the specific residues that stabilize the coiled coil are marked with asterisks (12, 13). The helix-turn-helix DNA binding motif consisting of the putative  $\alpha$  helices E and F of FNR are underlined (14). The conserved EXXSR motif of helix F that interacts with specific nucleotide residues is boxed in gray. The four essential cysteines of *E. coli* FNR are boxed and marked by filled arrowheads. The four cysteine residues that bind a C-terminal iron-sulfur cluster in FNR from *B. subtilis* and *B. licheniformis* are boxed and marked with open arrowheads. *L. casei* FLP, *L. lactis* F1pA, and *B. licheniformis* ArcR contain only two cysteines (boxed and marked with "+" below the alignment; for details see text). Note that only FixK<sub>2</sub> harbors a cysteine residue in the first position of helix E (highlighted by white letters on a black background).

Table S1. In vivo response of FixK<sub>2</sub> targets to treatment with 2 mM H<sub>2</sub>O<sub>2</sub>

| Gene no. | Gene name               | Known or predicted gene product                | $\Delta fixK_2$ | WT (min of H <sub>2</sub> O <sub>2</sub> exposure) |       |        | Mutant 8854 C183A-FixK <sub>2</sub> (min of H <sub>2</sub> O <sub>2</sub> exposure) |       |       |
|----------|-------------------------|------------------------------------------------|-----------------|----------------------------------------------------|-------|--------|-------------------------------------------------------------------------------------|-------|-------|
|          |                         |                                                |                 | 5                                                  | 10    | 30     | 5                                                                                   | 10    | 30    |
| bsl0169  |                         | hypothetical protein bsl0169                   | -2.00           | 2.03                                               | —     | —      | —                                                                                   | —     | —     |
| bsr0173  |                         |                                                | -2.04           | —                                                  | -2.02 | -2.01  | —                                                                                   | —     | —     |
| bll0174  |                         |                                                | 5.42            | —                                                  | —     | —      | —                                                                                   | —     | —     |
| bll0327  |                         |                                                | -2.09           | —                                                  | —     | —      | —                                                                                   | —     | —     |
| bll0333  |                         | alcohol dehydrogenase precursor                | -2.79           | 5.49                                               | 4.16  | 5.24   | —                                                                                   | —     | —     |
| bll0343  |                         | homogentisate 1,2-dioxygenase                  | 2.16            | -2.51                                              | —     | —      | —                                                                                   | —     | —     |
| blr0365  | <i>rps21</i>            | 30S ribosomal protein S21                      | 4.50            | 3.06                                               | —     | 3.93   | —                                                                                   | —     | —     |
| blr0400  |                         |                                                | -3.11           | —                                                  | —     | -2.16  | —                                                                                   | —     | —     |
| blr0402  |                         |                                                | -2.40           | —                                                  | —     | —      | —                                                                                   | —     | —     |
| blr0483  | <i>rimM</i>             | 16S rRNA processing protein                    | 2.06            | 2.06                                               | 2.10  | —      | —                                                                                   | —     | —     |
| blr0497  |                         | hypothetical protein blr0497                   | -27.40          | -2.09                                              | -2.67 | -4.65  | -2.37                                                                               | -2.96 | -3.72 |
| bll0561  |                         |                                                | -3.91           | —                                                  | -2.28 | -2.20  | —                                                                                   | —     | —     |
| blr0576  |                         |                                                | 4.50            | —                                                  | —     | —      | —                                                                                   | —     | —     |
| blr0577  |                         |                                                | 7.38            | —                                                  | —     | 2.73   | —                                                                                   | —     | —     |
| bll0590  |                         |                                                | 2.33            | —                                                  | —     | —      | —                                                                                   | —     | —     |
| bsl0808  |                         | hypothetical protein bsl0808                   | -2.60           | -2.99                                              | -3.82 | -3.80  | —                                                                                   | —     | —     |
| bll0818  |                         | hypothetical protein bll0818                   | -9.35           | -2.42                                              | -3.04 | -5.92  | —                                                                                   | -3.11 | -3.75 |
| blr0852  |                         |                                                | 4.09            | —                                                  | 2.39  | —      | —                                                                                   | —     | —     |
| bll1028  | <i>carQ</i>             | RNA polymerase sigma <sup>ECF</sup> factor     | -3.52           | 12.67                                              | 22.04 | 13.76  | 12.24                                                                               | 12.96 | 14.93 |
| blr1065  |                         | ABC transporter permease protein               | 2.30            | 2.54                                               | 2.34  | —      | —                                                                                   | —     | —     |
| blr1216  |                         |                                                | -2.93           | —                                                  | —     | -3.10  | —                                                                                   | —     | —     |
| blr1289  |                         | hypothetical protein blr1289                   | -23.15          | -4.10                                              | -3.44 | -8.33  | —                                                                                   | —     | —     |
| blr1309  |                         |                                                | -4.69           | —                                                  | —     | -2.69  | —                                                                                   | —     | —     |
| blr1311  |                         |                                                | -69.93          | —                                                  | —     | -4.85  | —                                                                                   | —     | —     |
| bll1463  |                         |                                                | 2.23            | —                                                  | —     | —      | —                                                                                   | —     | —     |
| blr1506  |                         |                                                | -2.98           | —                                                  | —     | —      | —                                                                                   | —     | —     |
| bll1532  |                         |                                                | -2.03           | —                                                  | —     | —      | —                                                                                   | —     | —     |
| blr1556  |                         |                                                | -2.70           | —                                                  | —     | —      | —                                                                                   | —     | —     |
| blr1564  |                         |                                                | -2.55           | —                                                  | —     | —      | —                                                                                   | —     | —     |
| bll1568  |                         |                                                | -3.06           | —                                                  | -2.42 | -2.74  | —                                                                                   | —     | —     |
| bll1684  |                         |                                                | 3.17            | —                                                  | —     | —      | —                                                                                   | —     | —     |
| blr1745  | <i>nifE</i>             | nitrogenase Mo-cofactor synthesis protein      | 2.49            | 8.27                                               | 5.50  | 3.88   | —                                                                                   | —     | —     |
| blr1746  | <i>nifN</i>             | nitrogenase Mo-cofactor synthesis protein      | 2.76            | 15.97                                              | 8.78  | 6.89   | —                                                                                   | —     | —     |
| blr1747  | <i>nifX</i>             | iron-molybdenum cofactor processing protein    | 2.40            | 9.81                                               | 5.25  | 5.88   | —                                                                                   | —     | —     |
| blr1748  |                         | hypothetical protein blr1748                   | 2.38            | 9.28                                               | 6.11  | 7.11   | —                                                                                   | —     | —     |
| bsr1749  |                         | hypothetical protein bsr1749                   | 2.21            | 7.79                                               | 4.57  | 6.77   | —                                                                                   | —     | —     |
| bsr1750  | <i>fer3</i>             | ferredoxin                                     | 2.13            | 6.14                                               | 3.95  | 5.85   | —                                                                                   | —     | —     |
| blr1756  | <i>nifS</i>             | nitrogenase metalclusters biosynthesis protein | 2.12            | 8.58                                               | 2.80  | —      | —                                                                                   | —     | —     |
| bsr1757  | <i>fixU</i>             | nitrogen fixation protein                      | 2.23            | 9.96                                               | 4.41  | 2.35   | —                                                                                   | —     | —     |
| bll1766  |                         | outer membrane protein                         | -4.85           | 3.23                                               | 3.70  | 2.49   | —                                                                                   | —     | —     |
| blr1883  | <i>rpoN<sub>1</sub></i> | DNA-directed RNA polymerase subunit N          | -3.55           | 2.20                                               | —     | —      | —                                                                                   | —     | —     |
| blr1936  |                         | hypothetical protein blr1936                   | 2.98            | 3.89                                               | 2.72  | 5.22   | —                                                                                   | —     | —     |
| bll1944  |                         | hypothetical protein bll1944                   | 5.18            | 13.65                                              | 5.74  | 2.95   | —                                                                                   | —     | —     |
| bll2007  |                         |                                                | -16.78          | —                                                  | —     | -6.17  | —                                                                                   | —     | —     |
| blr2071  |                         | inosamine-phosphate amidinotransferase         | -8.93           | 2.85                                               | 2.09  | —      | —                                                                                   | —     | —     |
| bll2109  |                         |                                                | -2.50           | —                                                  | —     | —      | —                                                                                   | —     | —     |
| blr2145  | <i>CYP</i>              | cytochrome P450 BJ-3                           | 2.28            | 9.36                                               | 4.20  | 2.22   | —                                                                                   | —     | —     |
| blr2146  |                         | dehydrogenase                                  | 2.58            | 14.73                                              | 7.85  | 4.38   | —                                                                                   | —     | —     |
| blr2147  | <i>CYP</i>              | cytochrome P450 BJ-4                           | 2.24            | 11.95                                              | 5.08  | 4.10   | —                                                                                   | —     | —     |
| blr2148  | <i>fpps</i>             | farnesyl diphosphate synthase                  | 2.21            | 7.94                                               | 3.87  | 3.65   | —                                                                                   | —     | —     |
| blr2149  |                         | hypothetical protein blr2149                   | 2.56            | 15.14                                              | 6.87  | 8.78   | —                                                                                   | —     | —     |
| bll2210  | <i>copA</i>             | multicopper oxidase                            | -2.35           | -3.97                                              | -3.27 | -8.55  | —                                                                                   | —     | —     |
| bll2211  | <i>copB</i>             | copper tolerance protein                       | -2.36           | -3.53                                              | -3.73 | -10.48 | —                                                                                   | —     | —     |
| bsl2212  |                         | hypothetical protein bsl2212                   | -2.15           | -3.91                                              | -3.82 | -6.76  | —                                                                                   | —     | —     |
| blr2276  |                         |                                                | 2.46            | —                                                  | —     | 2.48   | —                                                                                   | —     | —     |
| bll2292  | <i>petE</i>             | probable plastocyanin                          | -2.51           | -2.80                                              | -2.33 | -3.27  | —                                                                                   | —     | —     |
| bsl2328  |                         |                                                | -4.29           | —                                                  | —     | -2.18  | —                                                                                   | —     | —     |
| bll2329  |                         |                                                | -6.45           | —                                                  | —     | -3.80  | —                                                                                   | —     | —     |
| bll2330  |                         | hypothetical protein bll2330                   | -18.94          | -3.68                                              | -2.86 | -9.62  | —                                                                                   | -2.64 | —     |
| blr2344  |                         |                                                | -2.92           | —                                                  | —     | -2.81  | —                                                                                   | —     | —     |
| blr2348  |                         |                                                | -2.16           | —                                                  | —     | -2.44  | —                                                                                   | —     | —     |
| blr2349  |                         |                                                | -2.44           | —                                                  | —     | —      | —                                                                                   | —     | —     |
| bll2388  | <i>cyc2</i>             | cytochrome c <sub>2</sub>                      | -5.35           | 2.12                                               | —     | —      | -2.30                                                                               | -3.55 | -4.95 |
| blr2422  |                         |                                                | 2.58            | —                                                  | —     | —      | —                                                                                   | —     | —     |
| bll2471  |                         |                                                | -35.46          | —                                                  | —     | -4.90  | —                                                                                   | —     | —     |
| bll2515  |                         |                                                | -4.67           | —                                                  | —     | —      | —                                                                                   | —     | —     |
| bll2516  |                         | hypothetical protein bll2516                   | -2.67           | -2.09                                              | —     | -2.53  | —                                                                                   | —     | —     |

| Gene no. | Gene name               | Known or predicted gene product              | $\Delta fixK_2$ | WT (min of H <sub>2</sub> O <sub>2</sub> exposure) |       |        | Mutant 8854 C183A-FixK <sub>2</sub><br>(min of H <sub>2</sub> O <sub>2</sub> exposure) |       |       |
|----------|-------------------------|----------------------------------------------|-----------------|----------------------------------------------------|-------|--------|----------------------------------------------------------------------------------------|-------|-------|
|          |                         |                                              |                 | 5                                                  | 10    | 30     | 5                                                                                      | 10    | 30    |
| blI2517  |                         | acetate kinase (acetokinase) protein         | -10.24          | -5.68                                              | -2.24 | -8.77  | —                                                                                      | —     | —     |
| blI2518  |                         | phosphoketolase                              | -10.00          | -4.95                                              | -4.44 | -6.94  | —                                                                                      | —     | —     |
| blI2590  |                         | hypothetical protein blI2590                 | -13.61          | -2.44                                              | -2.43 | -4.02  | —                                                                                      | —     | —     |
| blr2611  |                         |                                              | -44.64          | —                                                  | —     | -3.94  | —                                                                                      | —     | -2.97 |
| blr2641  |                         | hypothetical protein blr2641                 | -2.58           | -2.35                                              | -2.56 | -3.69  | —                                                                                      | —     | —     |
| blI2647  |                         | hypothetical protein blI2647                 | -3.50           | -2.45                                              | -2.16 | -2.75  | —                                                                                      | —     | —     |
| blr2659  |                         | hypothetical protein blr2659                 | -16.29          | -3.46                                              | -5.52 | -15.22 | —                                                                                      | -2.07 | —     |
| blI2661  |                         |                                              | -6.99           | —                                                  | —     | -3.22  | —                                                                                      | —     | —     |
| blI2662  |                         | hypothetical protein blI2662                 | -14.60          | -2.48                                              | -2.28 | -7.35  | —                                                                                      | —     | —     |
| blI2663  |                         |                                              | -13.11          | —                                                  | —     | —      | —                                                                                      | —     | —     |
| blI2664  |                         | hypothetical protein blI2664                 | -4.67           | -2.87                                              | -2.00 | -4.18  | —                                                                                      | —     | —     |
| blI2665  |                         | Ats family arylsulfatase                     | -4.72           | -2.81                                              | -2.58 | -4.61  | —                                                                                      | —     | —     |
| blr2666  |                         |                                              | -3.19           | —                                                  | -2.30 | -2.91  | —                                                                                      | —     | —     |
| blr2668  |                         |                                              | -2.74           | —                                                  | —     | -3.27  | —                                                                                      | —     | —     |
| bsr2670  |                         |                                              | -5.59           | —                                                  | -3.26 | -5.29  | —                                                                                      | —     | —     |
| blr2671  |                         |                                              | -9.62           | —                                                  | —     | -2.82  | —                                                                                      | —     | —     |
| bsr2672  |                         | hypothetical protein bsr2672                 | -4.41           | -2.67                                              | -2.26 | -4.35  | —                                                                                      | —     | —     |
| blI2706  |                         |                                              | 3.25            | —                                                  | —     | —      | —                                                                                      | —     | —     |
| blI2757  | <i>fixK<sub>2</sub></i> | transcriptional regulator FixK               | 2.15            | -4.02                                              | -3.61 | -5.52  | —                                                                                      | —     | —     |
| blI2758  |                         | two-component response regulator             | -8.55           | -2.62                                              | -3.04 | -5.88  | -3.22                                                                                  | -4.00 | -4.37 |
| blr2761  |                         | hypothetical protein blr2761                 | -26.67          | -2.79                                              | -3.29 | -5.81  | —                                                                                      | —     | —     |
| blr2762  |                         |                                              | -20.37          | —                                                  | -2.34 | -7.41  | —                                                                                      | —     | —     |
| blr2763  |                         |                                              | -101.94         | —                                                  | —     | -6.25  | —                                                                                      | —     | —     |
| blr2764  |                         |                                              | -76.34          | —                                                  | —     | -6.13  | —                                                                                      | —     | —     |
| bsr2765  |                         |                                              | -76.34          | —                                                  | —     | -5.71  | —                                                                                      | —     | —     |
| blr2766  |                         |                                              | -52.36          | —                                                  | —     | -2.93  | —                                                                                      | —     | —     |
| blr2767  |                         |                                              | -63.29          | —                                                  | —     | -4.85  | —                                                                                      | —     | —     |
| blr2768  |                         |                                              | -26.46          | —                                                  | —     | -3.10  | —                                                                                      | —     | —     |
| blr2769  |                         |                                              | -61.35          | —                                                  | —     | -2.13  | —                                                                                      | —     | —     |
| bsr2770  |                         |                                              | -8.62           | —                                                  | —     | —      | —                                                                                      | —     | —     |
| bsr2822  |                         |                                              | -4.52           | —                                                  | —     | -2.11  | —                                                                                      | —     | —     |
| blr2836  |                         |                                              | 14.84           | —                                                  | —     | —      | —                                                                                      | —     | —     |
| blr2837  |                         |                                              | 3.82            | —                                                  | —     | —      | —                                                                                      | —     | —     |
| blr2852  |                         | hypothetical protein blr2852                 | -5.43           | -5.21                                              | -4.31 | -6.49  | —                                                                                      | —     | —     |
| blr2881  |                         |                                              | -2.08           | —                                                  | —     | —      | —                                                                                      | —     | —     |
| blr2887  |                         |                                              | 4.87            | —                                                  | —     | —      | —                                                                                      | —     | —     |
| blr2987  |                         | hypothetical protein blr2987                 | -10.10          | -2.11                                              | -2.60 | -5.21  | —                                                                                      | —     | —     |
| blr2988  |                         |                                              | -4.29           | —                                                  | —     | -2.44  | —                                                                                      | —     | —     |
| bsr3073  |                         |                                              | -10.00          | —                                                  | —     | -2.68  | —                                                                                      | -2.44 | —     |
| blI3115  |                         | hypothetical protein blI3115                 | -30.58          | -3.33                                              | -2.57 | -5.24  | —                                                                                      | —     | —     |
| blI3116  |                         | phosphoribosylpyrophosphate synthetase       | -27.78          | -2.30                                              | —     | -4.17  | —                                                                                      | —     | —     |
| blI3117  |                         | thymidine phosphorylase                      | -6.62           | -2.39                                              | -2.26 | -4.18  | —                                                                                      | —     | —     |
| blr3152  |                         | Hsp70 family molecular chaperone             | 3.11            | 2.50                                               | —     | —      | —                                                                                      | —     | —     |
| blr3169  |                         |                                              | 5.11            | —                                                  | —     | —      | —                                                                                      | —     | —     |
| bsJ3175  |                         |                                              | -3.21           | —                                                  | —     | —      | —                                                                                      | —     | —     |
| blr3353  |                         | ABC transporter substrate-binding protein    | -2.83           | -9.09                                              | -7.35 | -18.83 | —                                                                                      | —     | —     |
| blr3354  |                         |                                              | -2.66           | —                                                  | —     | —      | —                                                                                      | —     | —     |
| blr3400  |                         | oxidoreductase                               | -3.10           | -2.18                                              | -2.29 | -4.93  | —                                                                                      | —     | —     |
| blr3401  |                         |                                              | -3.17           | —                                                  | —     | -3.44  | —                                                                                      | —     | —     |
| blr3402  |                         |                                              | -2.65           | —                                                  | —     | -2.33  | —                                                                                      | —     | —     |
| blr3403  |                         |                                              | -3.51           | —                                                  | —     | -4.76  | —                                                                                      | —     | —     |
| blI3410  |                         |                                              | -2.75           | —                                                  | —     | —      | —                                                                                      | —     | —     |
| blr3414  |                         |                                              | -2.06           | —                                                  | —     | —      | —                                                                                      | —     | —     |
| blr3456  |                         | hypothetical protein blr3456                 | -11.25          | -3.77                                              | -3.64 | -8.47  | —                                                                                      | —     | —     |
| blr3457  | <i>pta</i>              | phosphate acetyltransferase                  | -5.10           | -2.29                                              | —     | -4.37  | —                                                                                      | —     | —     |
| blr3458  | <i>ackA2</i>            | acetate/propionate kinase                    | -4.95           | -2.08                                              | —     | -4.08  | —                                                                                      | —     | —     |
| blr3459  | <i>fabI</i>             | enoyl-(acyl carrier protein) reductase       | -6.54           | -2.56                                              | —     | -4.61  | —                                                                                      | —     | —     |
| blI3460  | <i>nodN</i>             | nodulation protein N                         | -2.88           | -3.22                                              | -2.87 | -5.26  | —                                                                                      | —     | —     |
| blI3462  |                         |                                              | -9.71           | —                                                  | —     | —      | —                                                                                      | —     | —     |
| blI3466  | <i>fixK</i>             | transcriptional regulator FixK               | -5.13           | -3.70                                              | -4.17 | -4.76  | —                                                                                      | —     | —     |
| blI3476  |                         | hypothetical membrane protein                | -12.55          | -4.46                                              | -4.52 | -6.25  | —                                                                                      | —     | —     |
| blr3477  |                         | aspartate aminotransferase                   | -18.62          | -4.69                                              | -5.38 | -6.85  | —                                                                                      | —     | —     |
| blr3478  |                         | hypothetical protein blr3478                 | -17.30          | -3.27                                              | -4.78 | -9.80  | —                                                                                      | —     | —     |
| blr3479  |                         | hypothetical protein blr3479                 | -4.05           | -3.73                                              | -2.49 | -4.07  | —                                                                                      | —     | —     |
| blI3480  |                         | hypothetical protein blI3480                 | -2.53           | -4.22                                              | -3.61 | -4.39  | —                                                                                      | —     | —     |
| blI3481  |                         | hypothetical protein blI3481                 | -18.18          | -10.94                                             | -9.90 | -20.62 | —                                                                                      | —     | —     |
| blr3482  |                         |                                              | -6.21           | —                                                  | —     | —      | —                                                                                      | —     | —     |
| blr3483  |                         |                                              | -5.85           | —                                                  | —     | —      | —                                                                                      | —     | —     |
| blr3486  |                         | hypothetical protein blr3486                 | -2.40           | -3.03                                              | -2.58 | -3.01  | —                                                                                      | —     | —     |
| blI3807  | <i>msbB</i>             | lipid A biosynthesis lauroyl acyltransferase | 2.18            | 3.53                                               | —     | —      | —                                                                                      | —     | —     |

| Gene no. | Gene name   | Known or predicted gene product          | $\Delta fixK_2$ | WT (min of H <sub>2</sub> O <sub>2</sub> exposure) |        |        | Mutant 8854 C183A-FixK <sub>2</sub><br>(min of H <sub>2</sub> O <sub>2</sub> exposure) |        |        |
|----------|-------------|------------------------------------------|-----------------|----------------------------------------------------|--------|--------|----------------------------------------------------------------------------------------|--------|--------|
|          |             |                                          |                 | 5                                                  | 10     | 30     | 5                                                                                      | 10     | 30     |
| blr3815  |             |                                          | -7.58           | —                                                  | —      | -3.34  | —                                                                                      | —      | —      |
| blr3835  |             |                                          | -8.70           | —                                                  | —      | —      | —                                                                                      | —      | —      |
| blr3845  |             |                                          | -2.15           | —                                                  | —      | —      | —                                                                                      | -2.49  | -2.64  |
| blr3871  |             |                                          | 3.93            | —                                                  | —      | —      | —                                                                                      | —      | —      |
| blr3884  |             |                                          | 4.24            | —                                                  | —      | —      | —                                                                                      | —      | —      |
| bsr3925  |             |                                          | -2.01           | —                                                  | —      | -2.33  | —                                                                                      | —      | —      |
| blr3998  |             | succinate-semialdehyde dehydrogenase     | -56.50          | -2.23                                              | -2.02  | -5.56  | —                                                                                      | —      | -2.69  |
| blr4011  |             | hypothetical protein blr4011             | 5.70            | 213.30                                             | 451.80 | 130.60 | 211.50                                                                                 | 182.40 | 166.00 |
| bsl4014  |             |                                          | 2.10            | —                                                  | —      | —      | —                                                                                      | —      | —      |
| blr4028  |             |                                          | 2.56            | —                                                  | —      | —      | —                                                                                      | —      | —      |
| blr4057  |             |                                          | -2.36           | —                                                  | —      | —      | —                                                                                      | —      | —      |
| blr4100  |             |                                          | 2.77            | —                                                  | —      | —      | —                                                                                      | —      | —      |
| blr4111  |             |                                          | -11.66          | —                                                  | —      | -3.83  | —                                                                                      | —      | —      |
| blr4112  |             |                                          | -8.26           | —                                                  | —      | -3.76  | —                                                                                      | —      | —      |
| blr4113  |             |                                          | -14.16          | —                                                  | —      | -3.56  | —                                                                                      | —      | —      |
| blr4114  |             |                                          | -62.50          | —                                                  | —      | -4.12  | —                                                                                      | —      | —      |
| blr4115  |             |                                          | -33.78          | —                                                  | —      | -3.00  | —                                                                                      | —      | —      |
| blr4116  |             |                                          | -8.33           | —                                                  | —      | -2.10  | —                                                                                      | —      | —      |
| blr4117  |             |                                          | -3.79           | —                                                  | 2.10   | -2.16  | —                                                                                      | —      | —      |
| blr4162  |             | hypothetical protein blr4162             | 2.30            | -2.58                                              | -2.09  | —      | —                                                                                      | —      | —      |
| blr4174  |             |                                          | -46.73          | —                                                  | -3.09  | -4.85  | -2.93                                                                                  | -4.18  | -7.19  |
| bsr4175  |             |                                          | -5.00           | —                                                  | -2.92  | -4.35  | —                                                                                      | -3.32  | —      |
| blr4189  |             |                                          | -2.37           | —                                                  | —      | -2.44  | —                                                                                      | —      | —      |
| blr4191  |             |                                          | -6.90           | —                                                  | —      | -3.21  | —                                                                                      | —      | —      |
| blr4193  |             |                                          | -5.03           | —                                                  | -2.28  | -3.32  | —                                                                                      | —      | —      |
| blr4224  |             | hypothetical protein blr4224             | -2.56           | -3.85                                              | -3.12  | -5.85  | —                                                                                      | —      | —      |
| blr4240  |             | hypothetical protein blr4240             | -25.06          | -3.37                                              | -4.44  | -10.82 | -2.04                                                                                  | -2.70  | -3.16  |
| blr4241  |             | hypothetical protein blr4241             | -83.33          | -3.27                                              | -4.50  | -9.17  | —                                                                                      | —      | —      |
| bsr4258  |             |                                          | 2.12            | —                                                  | —      | -2.10  | —                                                                                      | —      | —      |
| blr4266  |             |                                          | -2.46           | —                                                  | —      | —      | —                                                                                      | —      | —      |
| blr4303  |             |                                          | -2.42           | —                                                  | —      | —      | —                                                                                      | —      | —      |
| blr4352  |             | hypothetical protein blr4352             | -2.28           | -2.71                                              | -2.99  | -6.71  | —                                                                                      | —      | —      |
| blr4412  |             | hypothetical protein blr4412             | -20.75          | -5.88                                              | -5.35  | -11.74 | -2.05                                                                                  | -2.74  | —      |
| blr4535  |             |                                          | -4.67           | —                                                  | —      | —      | —                                                                                      | —      | —      |
| blr4594  |             | delta 9 acyl-lipid fatty acid desaturase | 2.20            | 4.87                                               | 3.86   | 4.71   | —                                                                                      | —      | —      |
| blr4618  |             |                                          | -3.88           | —                                                  | —      | —      | —                                                                                      | —      | —      |
| bsl4622  |             |                                          | -2.57           | —                                                  | —      | —      | —                                                                                      | —      | —      |
| bsl4623  |             | hypothetical protein bsl4623             | -3.16           | -3.77                                              | -3.75  | -4.27  | -2.06                                                                                  | -2.25  | -2.07  |
| bsl4628  |             | hypothetical protein bsl4628             | -2.41           | -2.88                                              | -2.86  | -3.80  | —                                                                                      | —      | —      |
| blr4629  |             |                                          | -2.21           | —                                                  | —      | -2.22  | —                                                                                      | —      | —      |
| blr4634  |             | hypothetical protein blr4634             | -20.16          | -2.31                                              | -2.74  | -6.85  | —                                                                                      | —      | —      |
| blr4635  |             | chaperonin GroEL                         | -29.41          | -4.88                                              | -4.59  | -12.36 | —                                                                                      | —      | —      |
| bsr4636  |             | putative cation transport regulator      | -89.29          | -3.39                                              | -3.73  | -10.38 | —                                                                                      | —      | —      |
| blr4637  |             | HspC2 heat shock protein                 | -111.48         | -3.72                                              | —      | -6.85  | —                                                                                      | —      | —      |
| blr4638  |             | hypothetical protein blr4638             | -100.00         | -3.60                                              | -4.03  | -27.32 | —                                                                                      | —      | —      |
| blr4639  |             | probable protease                        | -3.64           | -4.42                                              | -4.41  | -9.62  | —                                                                                      | —      | —      |
| blr4641  |             | hypothetical protein blr4641             | -3.64           | -4.72                                              | -4.93  | -16.84 | —                                                                                      | -2.75  | —      |
| blr4643  |             | hypothetical protein blr4643             | -10.34          | -3.69                                              | -3.48  | -8.85  | —                                                                                      | —      | —      |
| blr4644  |             | hypothetical protein blr4644             | -20.88          | -7.69                                              | -5.35  | -17.33 | —                                                                                      | —      | —      |
| blr4645  |             | hypothetical protein blr4645             | -10.58          | -6.49                                              | -5.08  | -10.75 | —                                                                                      | —      | —      |
| blr4646  |             | hypothetical protein blr4646             | -27.55          | -6.02                                              | -5.43  | -14.53 | —                                                                                      | —      | —      |
| bsl4647  |             |                                          | -6.29           | —                                                  | —      | —      | —                                                                                      | —      | -2.17  |
| bsl4650  |             | hypothetical protein bsl4650             | -20.92          | -3.46                                              | -2.20  | -6.71  | —                                                                                      | —      | —      |
| blr4651  |             | hypothetical protein blr4651             | -31.35          | -3.06                                              | -3.36  | -11.38 | —                                                                                      | —      | —      |
| blr4652  |             | hypothetical protein blr4652             | -95.24          | -8.40                                              | -8.62  | -23.04 | —                                                                                      | —      | —      |
| blr4653  | <i>dnaJ</i> | molecular chaperone DnaJ family          | -16.81          | -4.50                                              | -4.61  | -12.76 | —                                                                                      | —      | —      |
| blr4654  |             | hypothetical protein blr4654             | -30.03          | -5.21                                              | -5.08  | -15.04 | —                                                                                      | —      | —      |
| blr4655  | <i>ppsA</i> | phosphoenolpyruvate synthase             | -14.22          | -3.09                                              | -3.42  | -8.77  | —                                                                                      | —      | —      |
| blr4656  |             | hypothetical protein blr4656             | -5.05           | -2.24                                              | -2.46  | -3.72  | —                                                                                      | —      | —      |
| blr4657  |             | beta-glucosidase                         | -11.86          | -3.07                                              | -3.38  | -6.13  | —                                                                                      | —      | —      |
| blr4658  |             |                                          | -13.57          | —                                                  | —      | -4.29  | —                                                                                      | —      | —      |
| blr4659  |             |                                          | -28.90          | —                                                  | —      | -3.66  | —                                                                                      | —      | —      |
| blr4660  |             | similar to ABC transporter               | -8.20           | -2.24                                              | —      | -4.57  | —                                                                                      | —      | —      |
| blr4687  |             |                                          | 3.38            | —                                                  | —      | —      | —                                                                                      | —      | —      |
| blr4697  |             | hypothetical protein blr4697             | 10.74           | 3.01                                               | —      | 3.60   | —                                                                                      | —      | —      |
| blr4732  |             |                                          | 2.35            | —                                                  | —      | —      | —                                                                                      | —      | —      |
| blr4742  |             |                                          | -3.10           | —                                                  | -2.07  | -2.16  | —                                                                                      | —      | —      |
| blr4784  |             |                                          | -2.35           | —                                                  | —      | —      | —                                                                                      | —      | —      |
| blr4816  |             |                                          | -6.25           | —                                                  | —      | -3.86  | —                                                                                      | —      | —      |
| blr4817  |             | hypothetical protein blr4817             | -4.76           | -2.38                                              | —      | -4.29  | —                                                                                      | —      | —      |



| Gene no. | Gene name                | Known or predicted gene product              | $\Delta fixK_2$ | WT (min of H <sub>2</sub> O <sub>2</sub> exposure) |       |        | Mutant 8854 C183A-FixK <sub>2</sub><br>(min of H <sub>2</sub> O <sub>2</sub> exposure) |       |       |
|----------|--------------------------|----------------------------------------------|-----------------|----------------------------------------------------|-------|--------|----------------------------------------------------------------------------------------|-------|-------|
|          |                          |                                              |                 | 5                                                  | 10    | 30     | 5                                                                                      | 10    | 30    |
| blI4818  |                          |                                              | -9.01           | —                                                  | -2.67 | -6.13  | —                                                                                      | —     | —     |
| blI4819  |                          | hypothetical protein blI4819                 | -5.85           | -2.75                                              | -2.51 | -6.76  | —                                                                                      | —     | —     |
| bsr4821  |                          | hypothetical protein bsr4821                 | -3.07           | -2.81                                              | —     | -3.23  | —                                                                                      | —     | —     |
| blI4833  |                          |                                              | 2.51            | —                                                  | —     | —      | —                                                                                      | —     | —     |
| blI4860  |                          |                                              | 2.08            | —                                                  | —     | —      | —                                                                                      | —     | —     |
| blr4930  |                          | hypothetical protein blr4930                 | -4.05           | -2.79                                              | -2.02 | -3.64  | —                                                                                      | —     | —     |
| blr4931  |                          | hypothetical protein blr4931                 | -6.99           | -3.44                                              | -2.34 | -5.52  | —                                                                                      | —     | —     |
| blr4932  |                          | cation efflux system protein                 | -11.36          | -3.97                                              | -3.09 | -9.80  | —                                                                                      | —     | —     |
| blr4933  |                          | cation efflux system protein                 | -12.09          | -2.49                                              | —     | -6.85  | —                                                                                      | —     | —     |
| blr4955  |                          |                                              | -16.10          | —                                                  | -2.09 | -5.65  | —                                                                                      | -2.75 | —     |
| bsr4956  |                          |                                              | -3.24           | —                                                  | —     | -2.30  | —                                                                                      | —     | —     |
| bsr4957  |                          |                                              | -5.10           | —                                                  | —     | -3.64  | —                                                                                      | —     | —     |
| blI4961  |                          | hypothetical protein blI4961                 | -2.68           | -2.07                                              | -2.15 | -3.10  | —                                                                                      | —     | —     |
| blr4977  |                          |                                              | -2.41           | —                                                  | —     | —      | —                                                                                      | —     | —     |
| blI4991  |                          |                                              | -2.58           | —                                                  | -2.17 | -3.55  | —                                                                                      | —     | —     |
| bsI5002  |                          | hypothetical protein bsI5002                 | -5.46           | -3.13                                              | -3.28 | -7.41  | —                                                                                      | -2.59 | -3.18 |
| blI5041  |                          | hypothetical protein blI5041                 | -2.22           | -2.01                                              | —     | —      | —                                                                                      | —     | —     |
| blI5042  |                          |                                              | -2.48           | —                                                  | —     | —      | —                                                                                      | —     | —     |
| blI5078  |                          |                                              | -3.57           | —                                                  | -2.34 | -3.17  | —                                                                                      | —     | —     |
| blI5079  |                          | hypothetical protein blI5079                 | -8.06           | -2.94                                              | -2.30 | -2.65  | —                                                                                      | —     | —     |
| blI5080  |                          | AcrB/AcrD/AcrF family protein                | -6.94           | -3.27                                              | -2.92 | -6.37  | —                                                                                      | —     | —     |
| blI5081  |                          | multidrug resistance protein                 | -8.85           | -5.49                                              | -5.59 | -9.35  | —                                                                                      | —     | —     |
| blr5150  |                          | hypothetical protein blr5150                 | -4.50           | -3.73                                              | -4.81 | -5.78  | —                                                                                      | —     | —     |
| blI5176  |                          | hypothetical protein blI5176                 | -2.87           | -2.35                                              | -2.27 | -2.87  | —                                                                                      | —     | —     |
| bsI5177  |                          | hypothetical protein bsI5177                 | -2.00           | -2.71                                              | -2.59 | -2.79  | —                                                                                      | —     | —     |
| blr5270  |                          | hypothetical protein blr5270                 | -3.68           | 3.15                                               | —     | —      | —                                                                                      | —     | —     |
| bsr5273  |                          | hypothetical protein bsr5273                 | -102.56         | -2.10                                              | -2.94 | -8.06  | —                                                                                      | —     | -4.83 |
| blr5289  |                          |                                              | 4.47            | —                                                  | —     | —      | —                                                                                      | —     | —     |
| blI5315  |                          |                                              | -34.36          | —                                                  | —     | -3.83  | —                                                                                      | —     | -2.12 |
| bsr5316  |                          | hypothetical protein bsr5316                 | -22.47          | -3.92                                              | -5.62 | -11.39 | —                                                                                      | -3.39 | —     |
| blr5317  |                          |                                              | -11.35          | —                                                  | -2.13 | -4.93  | —                                                                                      | —     | —     |
| blI5375  | <i>rpI</i> Q             | 50S ribosomal protein L17                    | 2.31            | 2.48                                               | 2.32  | —      | —                                                                                      | —     | —     |
| blI5475  |                          | putative formate dehydrogenase               | -2.92           | -2.84                                              | -2.09 | -3.01  | —                                                                                      | —     | —     |
| blI5476  |                          | formate dehydrogenase iron-sulfur subunit    | -3.28           | -3.26                                              | -2.44 | -3.13  | —                                                                                      | —     | —     |
| blI5477  |                          | similar to formate dehydrogenase             | -3.09           | -3.24                                              | -2.17 | -3.60  | —                                                                                      | —     | —     |
| blI5478  |                          | similar to formate dehydrogenase             | -2.74           | -2.16                                              | -2.28 | -3.37  | —                                                                                      | —     | —     |
| bsI5479  |                          |                                              | -2.82           | —                                                  | —     | -3.18  | —                                                                                      | —     | —     |
| blI5500  |                          |                                              | -5.46           | —                                                  | —     | —      | —                                                                                      | —     | —     |
| blI5555  |                          | hypothetical protein blI5555                 | -2.85           | -2.54                                              | -2.73 | -2.42  | —                                                                                      | —     | —     |
| blI5570  |                          | hypothetical protein blI5570                 | -2.07           | -2.45                                              | -2.56 | -3.14  | —                                                                                      | —     | —     |
| bsr5571  |                          | hypothetical protein bsr5571                 | -2.29           | -2.21                                              | —     | -2.82  | —                                                                                      | —     | —     |
| blr5591  | <i>nah</i>               | salicylate hydroxylase                       | 3.55            | 2.35                                               | 2.10  | 3.23   | —                                                                                      | —     | —     |
| bsI5624  |                          | hypothetical protein bsI5624                 | -3.08           | -2.62                                              | -2.22 | -3.34  | —                                                                                      | —     | —     |
| blI5629  |                          |                                              | 21.00           | —                                                  | —     | —      | —                                                                                      | —     | —     |
| blI5655  |                          | alcohol dehydrogenase                        | -36.23          | -2.65                                              | -2.92 | -5.88  | —                                                                                      | -2.06 | —     |
| blr5673  |                          |                                              | -2.13           | —                                                  | —     | —      | —                                                                                      | —     | —     |
| blI5770  |                          |                                              | -5.49           | —                                                  | —     | -3.03  | —                                                                                      | —     | —     |
| blI5771  |                          |                                              | -2.45           | —                                                  | —     | -2.79  | —                                                                                      | —     | —     |
| blr5775  |                          |                                              | -4.90           | —                                                  | —     | -4.26  | —                                                                                      | —     | —     |
| bsr5776  |                          | hypothetical protein bsr5776                 | -8.77           | -2.58                                              | —     | -7.94  | —                                                                                      | —     | —     |
| blr5777  |                          |                                              | -5.71           | —                                                  | —     | -3.95  | —                                                                                      | —     | —     |
| blr5778  |                          |                                              | -5.21           | —                                                  | —     | -2.90  | —                                                                                      | —     | —     |
| bsr5798  |                          | hypothetical protein bsr5798                 | -3.95           | -3.22                                              | -2.35 | -2.44  | —                                                                                      | —     | —     |
| blr5827  |                          |                                              | -2.63           | —                                                  | —     | -3.48  | —                                                                                      | —     | —     |
| blr5828  |                          |                                              | -3.07           | —                                                  | —     | -2.34  | —                                                                                      | —     | —     |
| blr5830  |                          |                                              | -2.03           | —                                                  | —     | —      | —                                                                                      | —     | —     |
| blr5841  |                          | hypothetical protein blr5841                 | -5.13           | -2.10                                              | -2.81 | -2.51  | —                                                                                      | —     | —     |
| blr5847  |                          | hypothetical protein blr5847                 | -2.36           | -3.06                                              | -4.08 | -5.26  | —                                                                                      | —     | -2.16 |
| blr6041  |                          |                                              | 2.09            | —                                                  | —     | —      | —                                                                                      | —     | —     |
| blI6061  | <i>fixK</i> <sub>1</sub> | transcriptional regulatory protein           | -19.12          | -2.23                                              | -2.44 | -7.30  | —                                                                                      | —     | —     |
| blr6062  |                          | putative cytochrome c <sub>6</sub> precursor | -45.87          | -3.68                                              | -3.61 | -7.69  | —                                                                                      | —     | -2.90 |
| blI6063  |                          |                                              | -6.17           | —                                                  | —     | -3.89  | —                                                                                      | —     | —     |
| blI6064  |                          |                                              | -4.17           | —                                                  | —     | -3.17  | —                                                                                      | —     | —     |
| blI6065  |                          |                                              | -3.80           | —                                                  | —     | -3.17  | —                                                                                      | —     | —     |
| bsr6066  |                          | hypothetical protein bsr6066                 | -92.59          | -4.93                                              | -4.05 | -14.25 | —                                                                                      | —     | —     |
| blr6067  |                          | hypothetical protein blr6067                 | -20.88          | -3.21                                              | -2.74 | -5.88  | —                                                                                      | —     | —     |
| blI6068  |                          |                                              | -6.41           | —                                                  | —     | -3.19  | —                                                                                      | —     | —     |
| blI6069  |                          | hypothetical protein blI6069                 | -29.41          | -2.10                                              | -2.69 | -7.63  | —                                                                                      | —     | —     |
| blr6070  |                          |                                              | -7.30           | —                                                  | —     | -4.12  | —                                                                                      | —     | —     |
| blr6071  |                          |                                              | -5.18           | —                                                  | —     | -2.79  | —                                                                                      | —     | —     |

| Gene no. | Gene name               | Known or predicted gene product                | $\Delta fixK_2$ | WT (min of H <sub>2</sub> O <sub>2</sub> exposure) |       |        | Mutant 8854 C183A-FixK <sub>2</sub><br>(min of H <sub>2</sub> O <sub>2</sub> exposure) |       |       |
|----------|-------------------------|------------------------------------------------|-----------------|----------------------------------------------------|-------|--------|----------------------------------------------------------------------------------------|-------|-------|
|          |                         |                                                |                 | 5                                                  | 10    | 30     | 5                                                                                      | 10    | 30    |
| blr6072  |                         |                                                | -2.77           | —                                                  | —     | -2.88  | —                                                                                      | —     | —     |
| blI6073  | <i>phbC</i>             | poly-beta-hydroxybutyrate polymerase           | -27.86          | -2.11                                              | -2.52 | -7.14  | —                                                                                      | —     | —     |
| blr6074  |                         | hypothetical protein blr6074                   | -90.91          | -4.63                                              | -2.97 | -9.62  | —                                                                                      | —     | —     |
| blI6075  |                         |                                                | -3.39           | —                                                  | —     | —      | —                                                                                      | —     | —     |
| bsI6101  |                         |                                                | 2.70            | —                                                  | —     | —      | —                                                                                      | —     | —     |
| blr6128  |                         |                                                | -16.00          | —                                                  | -2.50 | -4.27  | —                                                                                      | -2.70 | -3.51 |
| blr6173  |                         |                                                | 2.15            | —                                                  | —     | —      | —                                                                                      | —     | —     |
| blr6443  |                         | ABC transporter permease protein               | 2.55            | 3.33                                               | 4.16  | 10.01  | —                                                                                      | —     | —     |
| blI6457  |                         |                                                | -2.69           | —                                                  | —     | —      | —                                                                                      | —     | —     |
| bsr6466  |                         |                                                | 7.79            | —                                                  | —     | —      | —                                                                                      | —     | —     |
| blI6513  |                         |                                                | 2.88            | —                                                  | —     | —      | —                                                                                      | —     | —     |
| bsr6520  |                         |                                                | -2.13           | —                                                  | -2.67 | -4.65  | —                                                                                      | —     | —     |
| blI6524  |                         | hypothetical protein blI6524                   | -11.86          | -2.07                                              | -2.89 | -5.75  | —                                                                                      | —     | —     |
| blI6525  |                         | hypothetical protein blI6525                   | -7.69           | -4.72                                              | -5.41 | -7.30  | —                                                                                      | —     | —     |
| blI6540  |                         |                                                | -4.95           | —                                                  | —     | -2.46  | —                                                                                      | —     | —     |
| blr6541  |                         | hypothetical protein blr6541                   | -90.91          | -4.67                                              | -4.05 | -11.19 | —                                                                                      | —     | —     |
| blr6578  |                         | ABC transporter permease protein               | 3.19            | 2.45                                               | 2.01  | —      | —                                                                                      | —     | —     |
| bsI6617  |                         |                                                | 3.24            | —                                                  | —     | —      | —                                                                                      | —     | —     |
| blI6673  |                         | hypothetical protein blI6673                   | -5.92           | -2.04                                              | -2.00 | -3.98  | —                                                                                      | —     | —     |
| bsr6686  |                         | hypothetical protein bsr6686                   | -3.86           | -2.15                                              | —     | -3.06  | —                                                                                      | —     | -2.11 |
| blr6718  |                         | hypothetical protein blr6718                   | -2.99           | -3.27                                              | -2.58 | -2.80  | —                                                                                      | —     | —     |
| blr6719  |                         | hypothetical protein blr6719                   | -2.10           | -2.99                                              | -2.87 | -3.15  | —                                                                                      | —     | —     |
| blI6799  |                         |                                                | 7.49            | —                                                  | —     | 6.71   | —                                                                                      | —     | —     |
| blI6893  |                         | hypothetical protein blI6893                   | -4.95           | -2.30                                              | -2.67 | -4.42  | —                                                                                      | —     | —     |
| blI6987  |                         | hypothetical signal peptide protein            | -2.00           | -2.55                                              | -3.19 | -4.00  | —                                                                                      | —     | —     |
| blI6988  |                         |                                                | -2.11           | —                                                  | —     | —      | —                                                                                      | —     | —     |
| bsr7036  |                         |                                                | -64.10          | —                                                  | -2.09 | -5.35  | —                                                                                      | —     | —     |
| blr7037  | <i>napD</i>             | periplasmic nitrate reductase                  | -25.25          | -2.26                                              | -2.39 | -5.46  | —                                                                                      | —     | -2.31 |
| blr7038  |                         |                                                | -102.88         | —                                                  | —     | -4.85  | —                                                                                      | —     | —     |
| blr7039  |                         |                                                | -102.04         | —                                                  | —     | -4.46  | —                                                                                      | —     | —     |
| blr7040  |                         |                                                | -60.98          | —                                                  | —     | -5.85  | —                                                                                      | —     | —     |
| blr7053  |                         |                                                | -11.47          | —                                                  | —     | -2.56  | —                                                                                      | —     | —     |
| blr7054  |                         |                                                | -5.21           | —                                                  | —     | -2.99  | —                                                                                      | —     | —     |
| blI7083  |                         | hypothetical protein blI7083                   | -15.70          | -3.32                                              | -2.73 | -4.13  | —                                                                                      | —     | —     |
| blr7084  | <i>nnrR</i>             | transcriptional regulatory protein             | -12.22          | -3.91                                              | -3.34 | -4.88  | —                                                                                      | —     | —     |
| bsI7085  |                         |                                                | -6.49           | —                                                  | —     | —      | —                                                                                      | —     | —     |
| blI7086  | <i>hemN<sub>2</sub></i> | coproporphyrinogen III oxidase                 | -97.09          | -2.83                                              | -3.36 | -7.52  | —                                                                                      | —     | —     |
| bsr7087  |                         | hypothetical protein bsr7087                   | -53.76          | -2.49                                              | -3.66 | -8.40  | —                                                                                      | -2.98 | -3.53 |
| blr7088  |                         |                                                | -8.06           | —                                                  | -2.33 | -5.03  | —                                                                                      | —     | —     |
| blr7089  | <i>nirK</i>             | respiratory nitrite reductase                  | -4.88           | -2.68                                              | —     | -2.46  | —                                                                                      | —     | —     |
| blr7175  |                         | hypothetical glutathione S-transferase protein | 3.27            | 2.38                                               | 2.49  | 2.01   | —                                                                                      | —     | —     |
| blr7222  |                         |                                                | 2.19            | —                                                  | —     | —      | —                                                                                      | —     | —     |
| blr7228  |                         |                                                | -7.69           | —                                                  | —     | —      | —                                                                                      | —     | —     |
| blI7241  |                         | hypothetical protein blI7241                   | -2.04           | -2.22                                              | -2.10 | —      | —                                                                                      | —     | —     |
| blI7307  |                         |                                                | -2.90           | —                                                  | —     | —      | —                                                                                      | —     | —     |
| blI7308  |                         |                                                | -2.92           | —                                                  | —     | —      | —                                                                                      | —     | —     |
| blr7321  |                         | hypothetical protein blr7321                   | -2.57           | -6.33                                              | -7.04 | -3.37  | —                                                                                      | —     | —     |
| blr7345  |                         | hypothetical protein blr7345                   | -16.78          | -4.50                                              | -3.66 | -9.01  | —                                                                                      | —     | —     |
| bsI7372  |                         | hypothetical protein bsI7372                   | -35.09          | -2.32                                              | -2.51 | -3.73  | —                                                                                      | -3.45 | —     |
| blI7401  |                         |                                                | -2.10           | —                                                  | -2.60 | -4.35  | —                                                                                      | —     | —     |
| blI7414  |                         | translation elongation factor EF-G             | -2.52           | -2.41                                              | -2.30 | -3.41  | —                                                                                      | —     | —     |
| blI7439  |                         | GTP-binding protein                            | 2.27            | 2.25                                               | —     | —      | —                                                                                      | —     | —     |
| blI7440  | <i>pth</i>              | peptidyl-tRNA hydrolase                        | 2.90            | 2.81                                               | 2.04  | —      | —                                                                                      | —     | —     |
| blI7487  |                         | hypothetical protein blI7487                   | 4.94            | 2.06                                               | 2.51  | 2.44   | —                                                                                      | —     | —     |
| blI7494  |                         | hypothetical protein blI7494                   | 2.01            | 2.73                                               | —     | —      | —                                                                                      | —     | —     |
| blI7495  |                         |                                                | 2.02            | —                                                  | —     | —      | —                                                                                      | —     | —     |
| blI7514  |                         |                                                | 2.07            | —                                                  | 2.07  | 2.16   | —                                                                                      | —     | —     |
| blI7551  |                         | hypothetical protein blI7551                   | -75.19          | -3.75                                              | -2.58 | -7.09  | —                                                                                      | —     | —     |
| blI7553  |                         | hypothetical protein blI7553                   | -11.36          | -3.97                                              | -4.76 | -8.62  | —                                                                                      | -2.07 | -2.39 |
| blr7666  |                         |                                                | -16.31          | —                                                  | —     | -7.25  | —                                                                                      | —     | —     |
| blr7680  |                         |                                                | 2.46            | —                                                  | —     | —      | —                                                                                      | —     | —     |
| bsr7683  |                         |                                                | -2.66           | —                                                  | —     | —      | —                                                                                      | —     | —     |
| blr7684  |                         |                                                | -5.65           | —                                                  | -2.22 | —      | —                                                                                      | —     | —     |
| blr7740  |                         |                                                | 2.95            | —                                                  | —     | —      | —                                                                                      | —     | —     |
| blr7780  |                         |                                                | -13.97          | —                                                  | —     | -4.52  | —                                                                                      | —     | —     |
| bsI7781  |                         |                                                | -3.03           | —                                                  | —     | —      | —                                                                                      | -2.44 | -2.82 |
| blI7787  |                         |                                                | -19.12          | —                                                  | -2.27 | -5.10  | —                                                                                      | -2.99 | -4.48 |
| blI7792  |                         | hypothetical protein blI7792                   | -2.72           | -2.31                                              | -2.41 | -4.24  | —                                                                                      | —     | —     |
| blr7866  |                         |                                                | 2.87            | —                                                  | 2.92  | —      | —                                                                                      | —     | —     |
| blr7872  |                         | HlyD family secretion protein                  | -37.45          | -4.69                                              | -4.67 | -7.81  | —                                                                                      | —     | -2.16 |

| Gene no. | Gene name  | Known or predicted gene product     | $\Delta fixK_2$ | WT (min of H <sub>2</sub> O <sub>2</sub> exposure) |       |       | Mutant 8854 C183A-FixK <sub>2</sub><br>(min of H <sub>2</sub> O <sub>2</sub> exposure) |       |    |
|----------|------------|-------------------------------------|-----------------|----------------------------------------------------|-------|-------|----------------------------------------------------------------------------------------|-------|----|
|          |            |                                     |                 | 5                                                  | 10    | 30    | 5                                                                                      | 10    | 30 |
| blr7873  |            | ABC transporter ATP-binding protein | -15.11          | -2.38                                              | -2.11 | -4.42 | —                                                                                      | —     | —  |
| blr7874  |            |                                     | -6.76           | —                                                  | -2.06 | —     | —                                                                                      | —     | —  |
| blr7961  |            | probable HspC2 heat shock protein   | -41.67          | -3.13                                              | —     | -6.54 | —                                                                                      | -2.27 | —  |
| bll7969  |            |                                     | 3.19            | —                                                  | —     | 5.18  | —                                                                                      | —     | —  |
| blr7978  |            |                                     | -2.35           | —                                                  | —     | —     | —                                                                                      | —     | —  |
| bll7981  |            |                                     | -8.06           | —                                                  | —     | -3.05 | —                                                                                      | —     | —  |
| bll7982  |            |                                     | -13.48          | —                                                  | —     | -3.70 | —                                                                                      | —     | —  |
| bll7986  |            | hypothetical protein bll7986        | -5.59           | -2.26                                              | —     | -3.23 | —                                                                                      | —     | —  |
| bll7987  |            | hypothetical protein bll7987        | -17.42          | -2.09                                              | —     | -4.18 | —                                                                                      | —     | —  |
| bll7988  |            | ATP-binding protein                 | -33.11          | -2.16                                              | -2.19 | -6.67 | —                                                                                      | —     | —  |
| bll7989  | <i>mat</i> | S-adenosylmethionine synthetase     | -5.29           | -2.11                                              | -2.14 | -4.35 | —                                                                                      | —     | —  |
| bll7990  |            |                                     | -19.69          | —                                                  | —     | -6.76 | —                                                                                      | —     | —  |
| bll7991  |            | hypothetical protein bll7991        | -22.83          | -2.58                                              | -2.57 | -8.26 | —                                                                                      | —     | —  |
| bsl7992  |            | hypothetical protein bsl7992        | -23.04          | -2.45                                              | -2.02 | -5.08 | —                                                                                      | —     | —  |
| bll7993  |            | hypothetical protein bll7993        | -8.47           | -2.74                                              | -2.43 | -5.00 | —                                                                                      | —     | —  |
| trnR-ACG |            |                                     | 2.76            | 2.63                                               | —     | 3.10  | —                                                                                      | —     | —  |

Changes of expression are shown for the following comparisons: micro-oxically grown  $\Delta fixK_2$  strain 9043 vs. micro-oxically grown wild type (WT) (1st data column); micro-oxically grown wild-type cells treated with H<sub>2</sub>O<sub>2</sub> for 5, 10, and 30 min compared to untreated culture of the wild type (2nd to 4th column); micro-oxically grown cells of mutant strain 8854 (C183A-FixK<sub>2</sub>) treated with H<sub>2</sub>O<sub>2</sub> for 5, 10, and 30 min compared to untreated culture of the same strain (5th to 7th column). Fold changes between +2 and -2 were considered as no change (—).
